# Supplementary material for: Biosynthesis of the corallorazines, a widespread class of antibiotic cyclic lipodipeptides
Source: Royal Society of Chemistry journal article supplement (doi:10.1039/d4cb00157e), 2024-01-01
Supplement: d4cb00157e1.pdf [file d4cb00157e1.pdf]

Supplementary Information for

# Biosynthesis of the corallorazines, a wide spread class of antibiotic cyclic lipodipeptides

## Contents

|                                                                                                                                                                                            |           |
|--------------------------------------------------------------------------------------------------------------------------------------------------------------------------------------------|-----------|
| <b>Supplementary Figures and Tables .....</b>                                                                                                                                              | <b>2</b>  |
| Table S1: Overview and deduced functions of open reading frames encoding the corallorazine BGC <i>crz1- crz8</i> (grey box) and adjacent genes. ....                                       | 2         |
| Figure S1: Proposed scheme of corallorazine biosynthesis. ....                                                                                                                             | 3         |
| Figure S2: SDS-PAGE of purified Crz1.1, Crz1.2 & Crz2. SDS-PAGE of protein fractions from expression of <i>E. coli</i> BAP1 expression strains holding respective expression plasmids..... | 4         |
| Figure S3: Core motifs in Crz 1/2 AGly. ....                                                                                                                                               | 5         |
| Figure S4: Unrooted maximum-likelihood bootstrap phylogeny trees of 275 sequences from the C domain superfamily.....                                                                       | 6         |
| Table S2: C domains from bacterial NRPS BGCs that cluster within the C <sub>modAA</sub> clade.....                                                                                         | 7         |
| Figure S5: Sequence alignment of 50 C <sub>modAA</sub> domains.....                                                                                                                        | 8         |
| Figure S7: Sequence logo of selected conserved motif sections for C domains from different subclades.....                                                                                  | 10        |
| Figure S8: Structural model of Crz1-C <sub>2</sub> seen from donor side.....                                                                                                               | 11        |
| Figure S9: Structural model of Crz1-C <sub>2</sub> with highlighted conserved residues.....                                                                                                | 11        |
| Table S3: Presence of <i>crz</i> homologues in BGCs from the BiG-SCAPE network analysis.....                                                                                               | 12        |
| Figure S10: Cytoscape network of homologous corallorazine BGCs.....                                                                                                                        | 15        |
| Figure S11: Examples of characteristic corallorazine-like BGCs from clade I-III.....                                                                                                       | 16        |
| Table S4: antiSMASH regions of BGCs with corallorazine-like genes.....                                                                                                                     | 17        |
| Table S5: Primers used for cloning of <i>crz</i> genes.....                                                                                                                                | 20        |
| <b>Supplementary References .....</b>                                                                                                                                                      | <b>21</b> |

## Supplementary Figures and Tables

**Table S1: Overview and deduced functions of open reading frames encoding the corallorazine BGC *crz1- crz8* (grey box) and adjacent genes.**

| Gene         | Size (kb) | Highest homology (protein level)                                                          | Putative function                                              | Identity of aligned amino acids | GenBank accession number |
|--------------|-----------|-------------------------------------------------------------------------------------------|----------------------------------------------------------------|---------------------------------|--------------------------|
| <i>orf1</i>  | 981       | FHA domain-containing protein [ <i>Corallococcus coralloides</i> ]                        | signal transduction/regulation??                               | 315/322 (98%)                   | WP_014396743.1           |
| <i>orf2</i>  | 1350      | serine protease [ <i>Corallococcus coralloides</i> ]                                      | S1C family peptidase                                           | 438/449 (98%)                   | WP_014396742.1           |
| <i>orf3</i>  | 669       | hypothetical protein [ <i>Corallococcus coralloides</i> ]                                 | hypothetical protein                                           | 218/221 (99%)                   | WP_014396741.1           |
| <i>crz1</i>  | 7,131     | non-ribosomal peptide synthetase [ <i>Streptomyces hokutonensis</i> ]                     | NRPS                                                           | 1345/2381 (56%)                 | WP_019071574.1           |
| <i>crz2</i>  | 1,716     | NAD-dependent epimerase/dehydratase family protein [ <i>Methylobacter tundripaludum</i> ] | PCP reduction domain                                           | 368/566 (65%)                   | WP_104427995.1           |
| <i>crz3</i>  | 1,815     | fatty acyl-AMP ligase [ <i>Streptomyces sp.</i> ]                                         | AMP-ligase                                                     | 349/570 (61%)                   | WP_059249057.1           |
| <i>crz4</i>  | 1,725     | hypothetical protein [ <i>Methylobacter tundripaludum</i> ]                               | Acyl-CoA dehydrogenase                                         | 318/581 (55%)                   | WP_104427994.1           |
| <i>crz5</i>  | 1,731     | acyl-CoA dehydrogenase [ <i>Methylobacter tundripaludum</i> ]                             | Acyl-CoA dehydrogenase                                         | 310/577 (54%)                   | WP_104427993.1           |
| <i>crz6</i>  | 261       | polyketide synthase [ <i>Methylobacter tundripaludum</i> ]                                | acyl carrier protein                                           | 42/75 (56%)                     | WP_104427992.1           |
| <i>crz7</i>  | 1,227     | cytochrome P450 [ <i>Methylobacter tundripaludum</i> ]                                    | cytochrome P450                                                | 265/401 (66%)                   | WP_104427991.1           |
| <i>crz8</i>  | 579       | FMN reductase [ <i>Acidobacteria bacterium</i> ]                                          | NAD(P)H-dependent oxidoreductase                               | 95/175 (54%)                    | PYT83693.1               |
| <i>orf12</i> | 31,506    | non-ribosomal peptide synthetase [ <i>Corallococcus coralloides</i> ]                     | NRPS/long-chain fatty acid CoA ligase                          | 10289/10504 (98%)               | WP_014396740.1           |
| <i>orf13</i> | 1602      | MBL fold metallo-hydrolase [ <i>Corallococcus coralloides</i> ]                           | putative antibiotic biosynthesis protein ( $\beta$ -lactamase) | 523/533 (98%)                   | WP_014396739.1           |
| <i>orf14</i> | 1026      | CPBP family intramembrane metalloprotease [ <i>Corallococcus coralloides</i> ]            | resistance??                                                   | 326/341 (96%)                   | WP_014396738.1           |

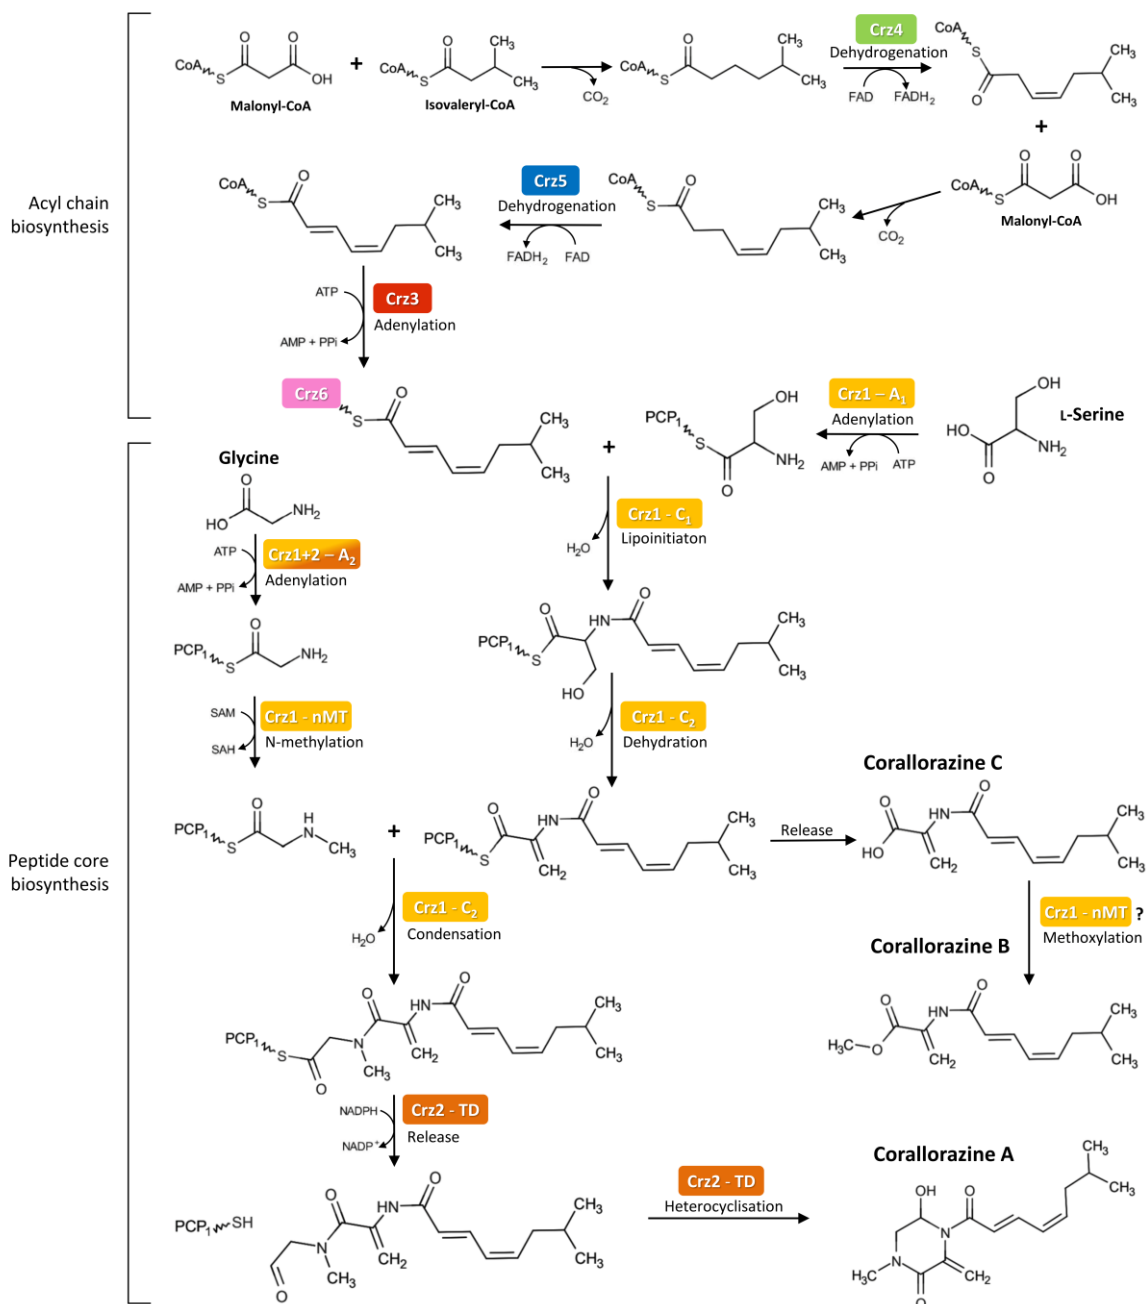

**Figure S1: Proposed scheme of corallorazine biosynthesis.** For each reaction step, the respective catalyzing enzymatic domain of proteins Crz1-6, indicated in different colors, is shown.

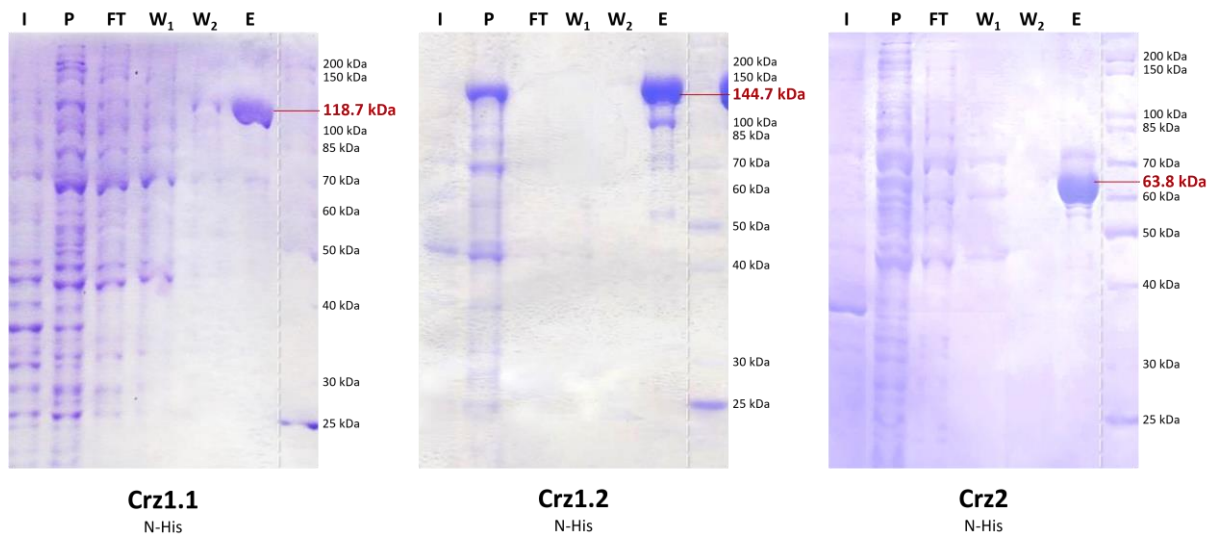

**Figure S2: SDS-PAGE of purified Crz1.1, Crz1.2 & Crz2.** SDS-PAGE gels of protein fractions from expressions of *E. coli* BAP1 cultures containing respective expression plasmids. I = pellet from induced culture; P = insoluble cell pellet of lysed culture; FT = non-binding flow-through; W<sub>1</sub> = wash buffer I, W<sub>2</sub> = wash buffer II; E = elution fraction. Sizes of expected bands are shown in red. NEB Unstained Protein Standard Broad Range (10-200 kDa) ladder was used as size reference. Proteins were separated at 140 V on 12% SDS gels and stained with Coomassie Blue.

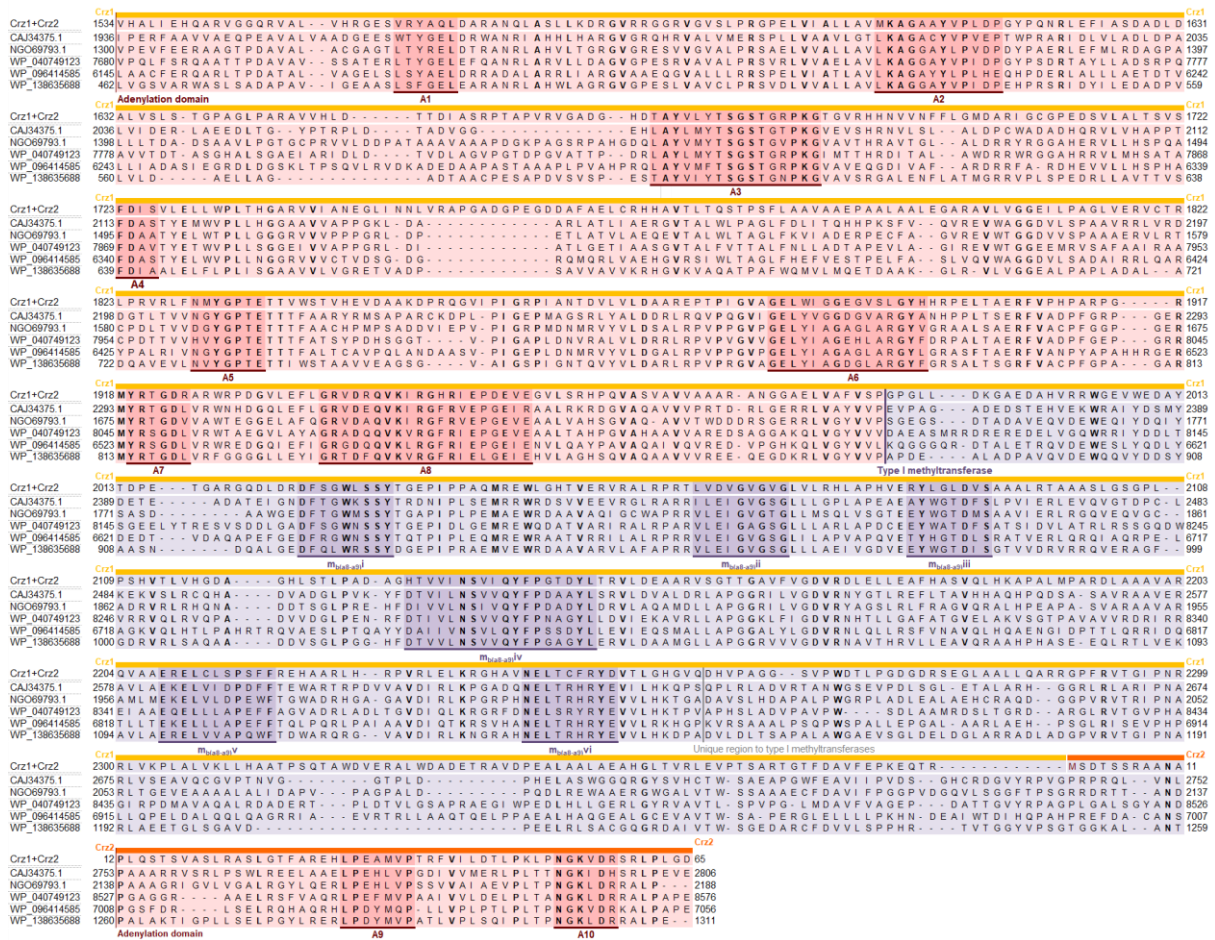

**Figure S3: Core motifs in Crz1/2 AGly.** Alignment of AGly located on Crz1 (aa 1534 - 2376) plus Crz2 (aa 1 - 65) with further type I methyltransferase interrupted A domains according to Lundy et al. [1] Core motifs A1-10 [2,3] of A domains (red) as well as consensus motifs m<sub>b</sub>(a8-a9)<sub>i-vi</sub> and the unique region of type I MTs (purple) are indicated below. Amino acids residing on Crz1 are indicated by the upper yellow bar and those on Crz2 by the upper orange bar.

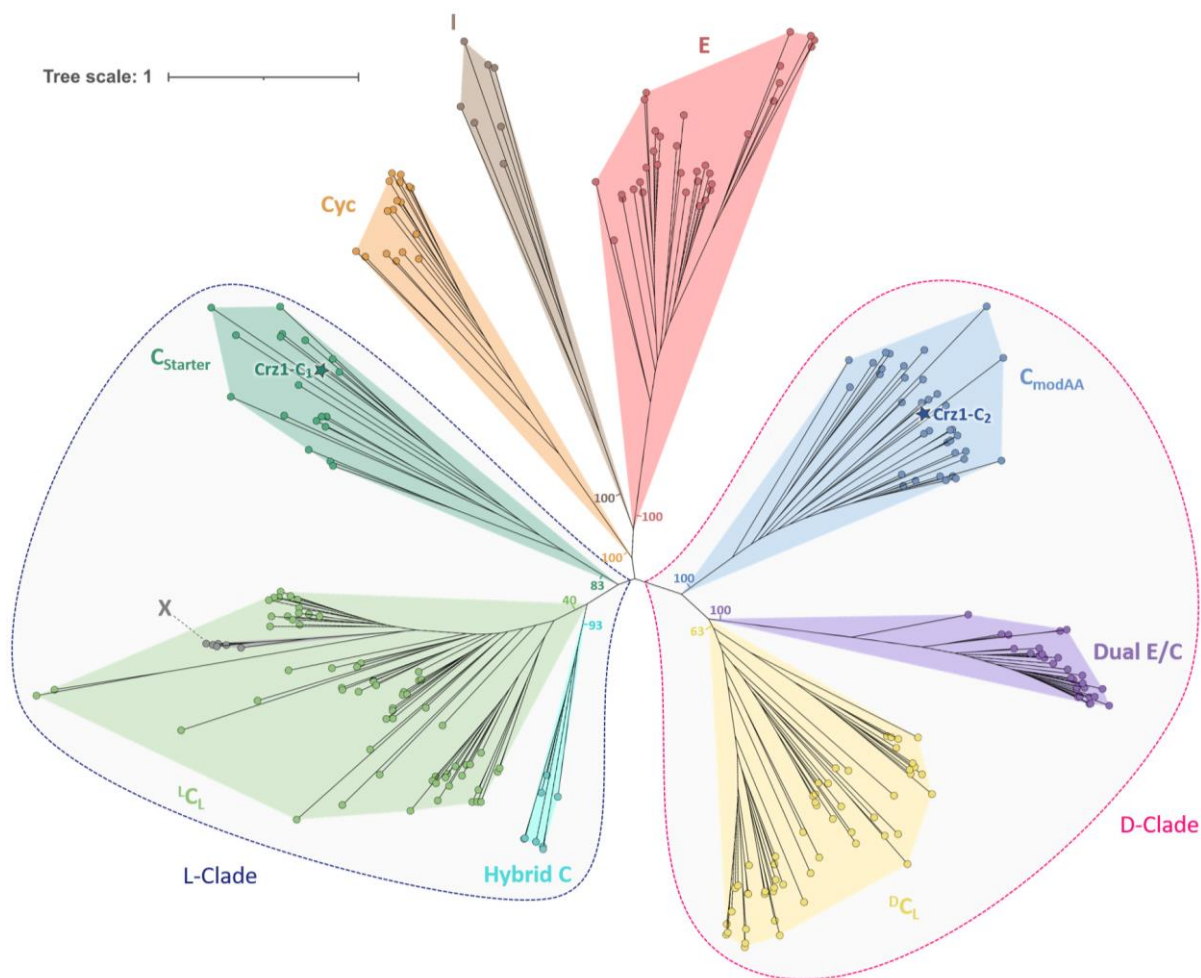

**Figure S4: Unrooted maximum-likelihood bootstrap phylogeny trees of 275 sequences from the C domain superfamily.** Clades representing different functional subtypes are highlighted in different colours and provided with bootstrap values. Following subtypes are included in the tree: Heterocyclization (Cyc, orange), Interface (I, brown), Epimerization (E, red), dehydrating/amino acid-modifying ( $C_{modAA}$ , blue), Dual epimerization/condensation (Dual E/C, purple),  $^D C_L$  (yellow), Hybrid PKS/NRPS metabolite associated (Hybrid C, cyan),  $^L C_L$  (light green), inactive & cytochrome P450 recruiting (X, grey), and Starter ( $C_{Starter}$ , dark green). Both C domains from the corallorazine biosynthetic pathway are indicated by asterisks. The L- and D-clades are circled in dark blue and pink. Visualisation was done with iTol v6 [4].

**Table S2: C domains from bacterial NRPS BGCs that cluster within the C<sub>modAA</sub> clade.** Listed are C<sub>modAA</sub> domains sorted according to the final modification of the amino acid they act on, as classified by Patteson et al. [5], being either dehydration only (DH, blue), L-2-amino-4-methoxy-*trans*-3-butenoic acid formation (AMB, purple), pyrrolizidine alkaloid formation (PA, green), pyrimidine formation (PY, orange), conjugate addition on side chain (CA, red) or conjugate addition on side chain instead of amide formation (CA\*, yellow). In addition to domains already reported by Patteson et al., the list contains further potential C<sub>modAA</sub> domains identified here by analyses of MIBiG 3.1 [6] and recent literature.

|                     | C Domain             | NCBI Protein Accession Nr. | Biosynthesis Pathway        | MIBiG Pathway Accession Nr.            | Producer organism                                  | Reference (PMID) |
|---------------------|----------------------|----------------------------|-----------------------------|----------------------------------------|----------------------------------------------------|------------------|
| DH                  | AlbB-C <sub>1</sub>  | KAA6212234.1               | Allopeptide                 | -                                      | <i>Streptomyces albofaciens</i> JCM 4342           | 33107670         |
|                     | AlbB-C <sub>2</sub>  | KAA6212234.1               | Allopeptide                 | -                                      | <i>Streptomyces albofaciens</i> JCM 4342           | 33107670         |
|                     | Arg2-C <sub>3</sub>  | QCE43602.1                 | Argyirin                    | BGC0001834                             | <i>Cystobacter</i> sp. SBCb004                     | 30995838         |
|                     | BogB-C <sub>1</sub>  | ATY37589.1                 | Bogorol                     | BGC0001532                             | <i>Brevibacillus laterosporus</i> DSM 25           | 27694801         |
|                     | CirA8-C <sub>2</sub> | BEV36892.1                 | Cirratomycin                | -                                      | <i>Streptomyces cirratus</i> 248-Sq2               | 38456538         |
|                     | Crz1-C <sub>2</sub>  | QAT85340.1                 | Corallorazine               | -                                      | <i>Corallococcus coralloides</i> B035              | This study       |
|                     | DepE-C <sub>2</sub>  | ABP57749.1                 | Romidepsin (FK228/FR901228) | BGC0000993                             | <i>Chromobacterium violaceum</i> 968               | 21183645         |
|                     | HasO-C <sub>2</sub>  | AHZ20774.1                 | Hassallidin C               | BGC0000369                             | <i>Anabaena</i> sp. Syke748                        | 24742428         |
|                     | HasO-C <sub>2</sub>  | CZT62784.1                 | Hassallidin E               | BGC0001614                             | <i>Planktothrix sarta</i> PCC 8927                 | 28489343         |
|                     | HbcE-C <sub>2</sub>  | MDK4218996.1               | Herbicolin A                | -                                      | <i>Pantoea agglomerans</i> 9Rz4                    | 36528875         |
|                     | HptC-C <sub>2</sub>  | AJK45701.1                 | Haereoplatin                | -                                      | <i>Burkholderia plantarii</i> PG1                  | 32808751         |
|                     | HptC-C <sub>3</sub>  | AJK45701.1                 | Haereoplatin                | -                                      | <i>Burkholderia plantarii</i> PG1                  | 32808751         |
|                     | JagA-C <sub>2</sub>  | CCJ67645.1                 | Jagaricin                   | BGC0001127                             | <i>Janthinobacterium agaricidamnorum</i> DSM 9628  | 23161559         |
|                     | JagC-C <sub>2</sub>  | CCJ67647.1                 | Jagaricin                   | BGC0001127                             | <i>Janthinobacterium agaricidamnorum</i> DSM 9628  | 23161559         |
|                     | LxaC-C <sub>3</sub>  | KYC42747.1                 | Scytocyclamide A            | BGC0002484                             | <i>Scytonema hofmannii</i> PCC 7110                | 33042096         |
|                     | LxaC1-C <sub>3</sub> | QSJ20135.1                 | Heinamide A1-3              | BGC0002572                             | <i>Nostoc</i> sp. UHCC 0702                        | 34085692         |
|                     | McyA-C <sub>1</sub>  | AAF00960.1                 | Microcystin                 | BGC0001017                             | <i>Microcystis aeruginosa</i> PCC 7806             | 11033079         |
|                     | McyA-C <sub>1</sub>  | QCQ67879.1                 | Microcystin                 | BGC0002297                             | <i>Phormidium</i> sp. LP904c                       | 31067786         |
|                     | McyA-C <sub>1</sub>  | CAD29797.1                 | Microcystin                 | BGC0001015                             | <i>Planktothrix agardhii</i> NIVA-CYA 126/8        | 12511503         |
|                     | McyA-C <sub>1</sub>  | AAO62586.1                 | Microcystin                 | BGC0001016                             | <i>Anabaena</i> sp. 90                             | 14766543         |
|                     | McyA-C <sub>1</sub>  | AQH32484.1                 | Microcystin                 | BGC0001667                             | <i>Fischerella</i> sp. CENA161                     | 29154789         |
|                     | MxvA-C <sub>2</sub>  | WCB70648.1                 | Myxovalargin                | -                                      | <i>Corallococcus coralloides</i> 1071              | 36603206         |
|                     | MxvC-C <sub>9</sub>  | WCB70646.1                 | Myxovalargin                | -                                      | <i>Corallococcus coralloides</i> 1071              | 36603206         |
|                     | MxD-C <sub>5</sub>   | WCB70647.1                 | Myxovalargin                | -                                      | <i>Corallococcus coralloides</i> 1071              | 36603206         |
|                     | NdaA-C <sub>1</sub>  | ATP76243.1                 | Nodularin                   | BGC0001705                             | <i>Nostoc</i> sp. CENA543                          | 29062311         |
|                     | NdaA-C <sub>1</sub>  | AE014743.1                 | Nodularin                   | BGC0000396                             | <i>Nostoc</i> sp. 73.1                             | 22456448         |
|                     | OdI4-C <sub>3</sub>  | CEK23364.1                 | Odilorhabdin NOSO-95 A-C    | BGC0001716                             | <i>Xenorhabdus nematophila</i> AN6/1               | 29625040         |
|                     | PuwF-C <sub>2</sub>  | AIW82283.1                 | Puwainaphycin               | BGC0001125                             | <i>Cylindrospermum alatosporum</i> CCALA 988       | 25369527         |
|                     | PuwF-C <sub>2</sub>  | AXN93614.1                 | Puwainaphycin               | BGC0001953                             | <i>Anabaena</i> sp. UHCC-0399                      | 30504214         |
|                     | PuwG-C <sub>1</sub>  | AIW82284.1                 | Puwainaphycin               | BGC0001125                             | <i>Cylindrospermum alatosporum</i> CCALA 988       | 25369527         |
| PuwG-C <sub>1</sub> | AXN93615.1           | Puwainaphycin              | BGC0001953                  | <i>Anabaena</i> sp. UHCC-0399          | 30504214                                           |                  |
| ThiF-C <sub>2</sub> | UYH37519.1           | Thiamyxins                 | -                           | <i>Myxococcaceae bacterium</i> MCy9487 | 36208117                                           |                  |
| VioC-C <sub>2</sub> | AWI62628.1           | Vioprolide                 | BGC0001822                  | <i>Cystobacter</i> sp. Cb vi35         | 29694699                                           |                  |
| Zel5-C <sub>2</sub> | QXJ21809.1           | Zelkovamycin B-E           | BGC0002370                  | <i>Actinomadura graeca</i> 32-07       | 33216552                                           |                  |
| AMB                 | AmbE-C <sub>1</sub>  | AAG05690.1                 | Methoxyvinylglycine (AMB)   | BGC0000287                             | <i>Pseudomonas aeruginosa</i> PAO1                 | 29633497         |
| AMB                 | AzeB-C <sub>2</sub>  | AAG06715.1                 | Azabicyclene                | BGC0002037                             | <i>Pseudomonas aeruginosa</i> PAO1                 | 31247735         |
|                     | AzeB-C <sub>2</sub>  | AEW95634.1                 | Azabicyclene                | BGC0002697                             | <i>Streptomyces cattleya</i> NRRL 8057 = DSM 46488 | 35246663         |
| PA                  | BhmJ-C <sub>2</sub>  | OKJ61999.1                 | Bohemamine A-C              | BGC0002147                             | <i>Streptomyces</i> sp. CB02009                    | 32463693         |
|                     | BraB-C <sub>2</sub>  | CDF96614.1                 | Brabantamide                | BGC0001149                             | <i>Pseudomonas</i> sp. SHC52                       | 24436210         |
|                     | LgnD-C <sub>2</sub>  | AIZ66879.1                 | Legonmycin                  | BGC0002666                             | <i>Streptomyces</i> sp. MA37                       | 35013184         |
| PA                  | PxA-C <sub>2</sub>   | WP_051462298.1             | Pyrrolizixenamide A         | BGC0001873                             | <i>Xenorhabdus szentirmaii</i> DSM 16338           | 26465655         |
| PY                  | BlmX-C <sub>2</sub>  | AAG02355.1                 | Bleomycin                   | BGC0000963                             | <i>Streptomyces verticillus</i> ATCC15003          | 11048953         |
|                     | TlmX-C <sub>2</sub>  | ABL74936.1                 | Tallysomycin                | BGC0001048                             | <i>Streptoalloteichus hindustanus</i> ATCC 31158   | 17216057         |
|                     | ZbmX-C <sub>2</sub>  | ACG60782.1                 | Zorbamycin                  | BGC0001058                             | <i>Streptomyces pilosus</i>                        | 19081934         |
| CA                  | FclJ-C <sub>2</sub>  | PHM26613.1                 | Fabclavine                  | BGC0001130                             | <i>Xenorhabdus budapestensis</i> DSM 16342         | 24532262         |
|                     | TnaC-C <sub>3</sub>  | AVI26390.1                 | Theonellamide               | BGC0001800                             | <i>Candidatus Entotheonella sarta</i>              | 29439203         |
|                     | Zmn17-C <sub>2</sub> | CCM44337.1                 | Zeamine                     | BGC0001056                             | <i>Serratia plymuthica</i> RVH1                    | 23349809         |
| CA*                 | BlmVI-C <sub>2</sub> | AAG02359.1                 | Bleomycin                   | BGC0000963                             | <i>Streptomyces verticillus</i> ATCC15003          | 11048953         |
|                     | TlmVI-C <sub>2</sub> | ABL74940.1                 | Tallysomycin                | BGC0001048                             | <i>Streptoalloteichus hindustanus</i> ATCC 31158   | 17216057         |
|                     | ZbmVI-C <sub>2</sub> | ACG60776.1                 | Zorbamycin                  | BGC0001058                             | <i>Streptomyces pilosus</i>                        | 19081934         |

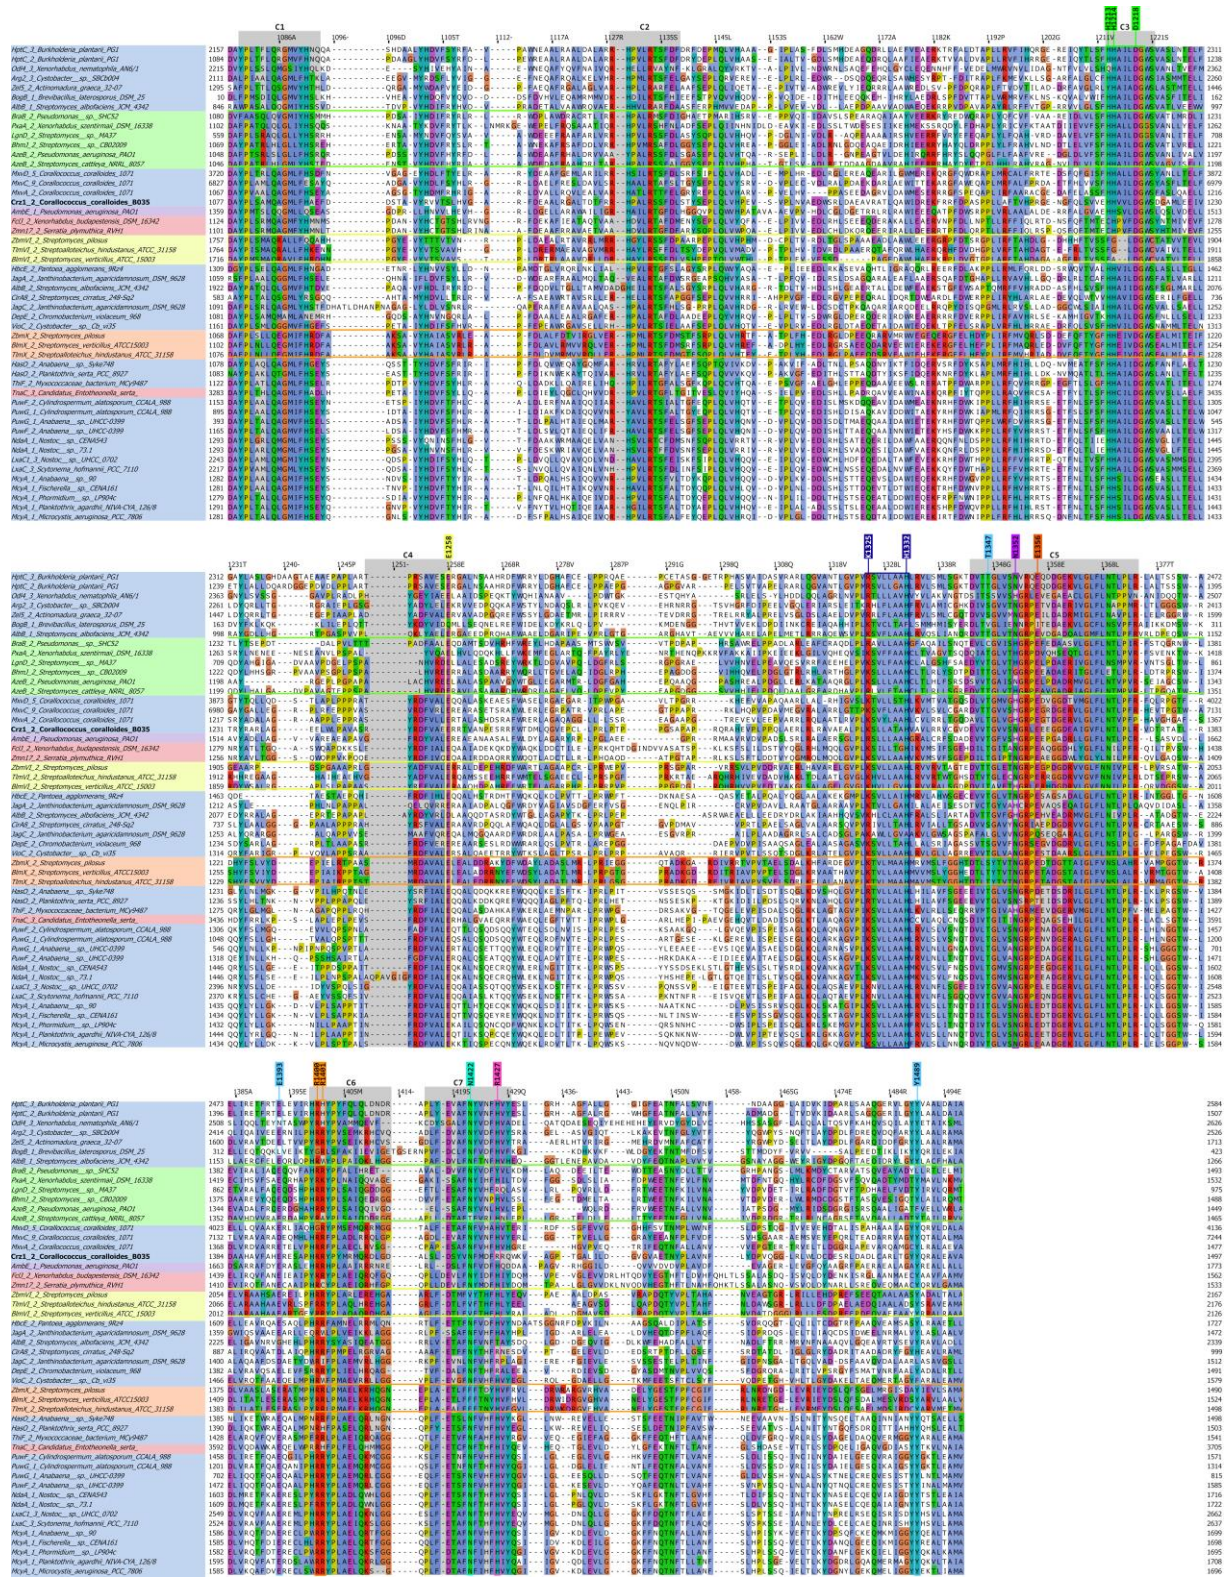

**Figure S5: Sequence alignment of 50 C<sub>modAA</sub> domains.** Domain names are colored according to their predicted function in Figure 3. Position scale above the alignment corresponds to the numbering in Crz1. Sites that are potentially important and specific for C<sub>modAA</sub> domains, and C domain core motifs, are labelled above the alignment in accordance with Figure S6. Alignment was performed and visualized using Jalview [7].



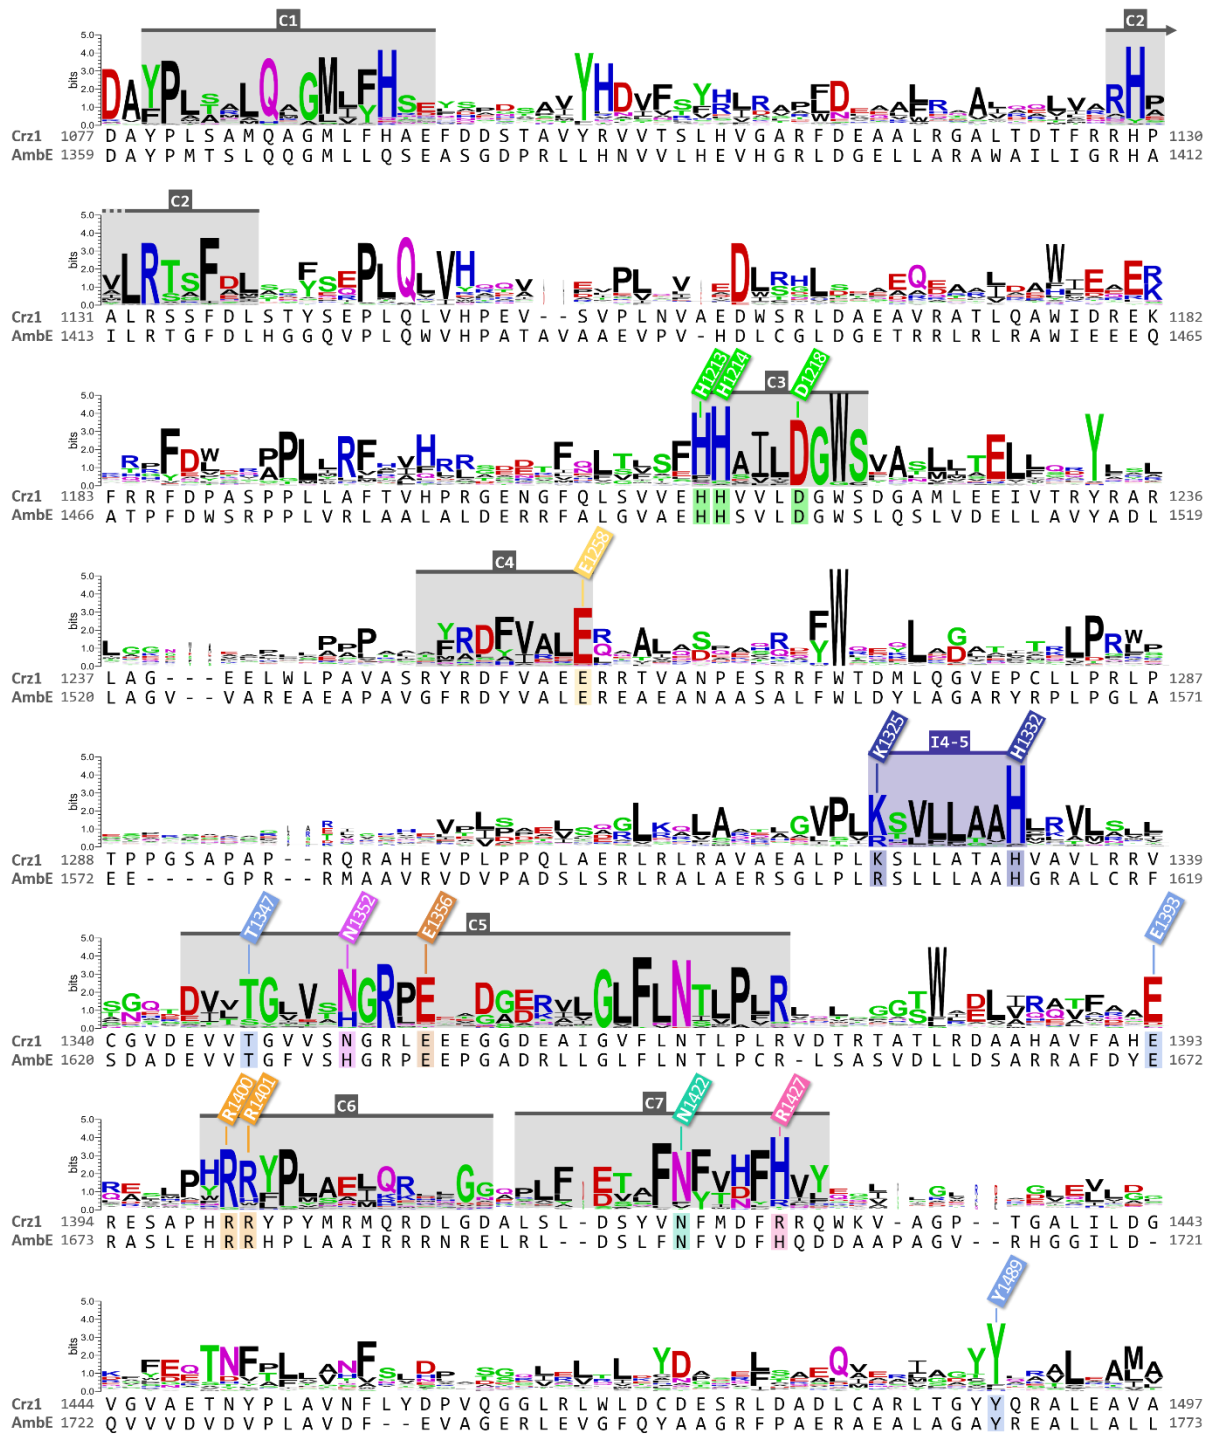

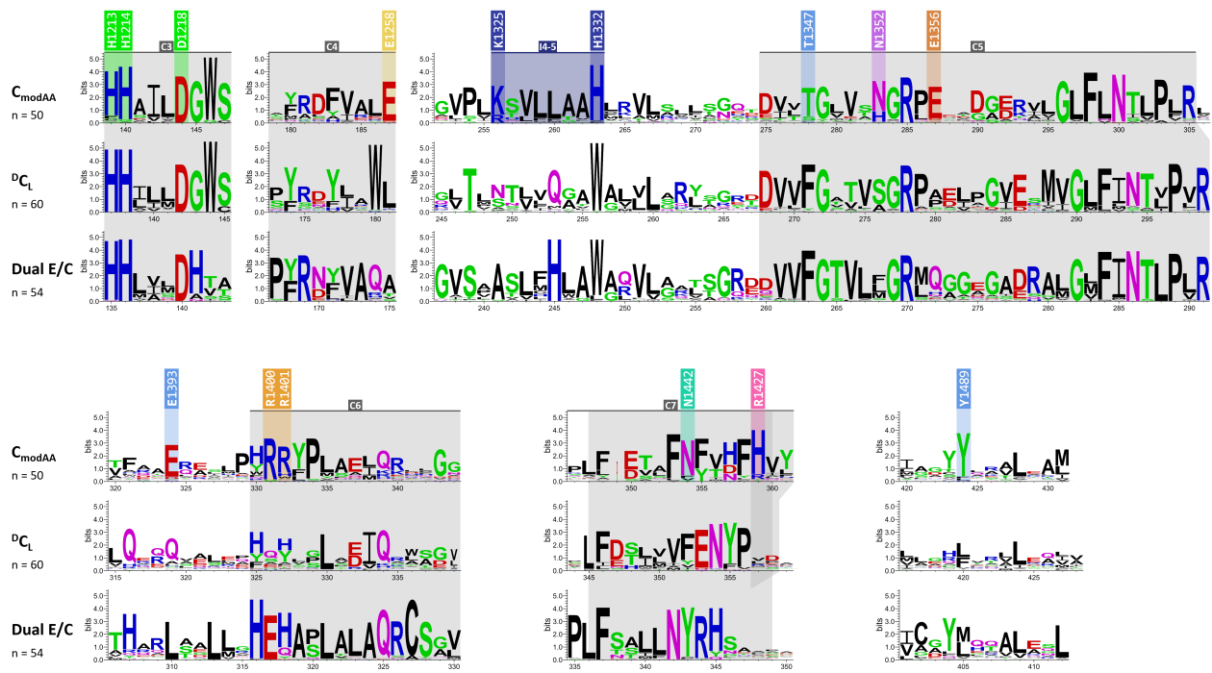

**Figure S7: Sequence logo of selected conserved motif sections for C domains from different subclades.** Selected residues are highlighted in different colors, the  $C_{modAA}$ -typical inter-motif “14-5” is highlighted dark blue. Conserved C domain core motifs (highlighted grey) were identified according to He et al. [8] and Rausch et al. [9]. Sequence logos were created using WebLogo 3 [10].

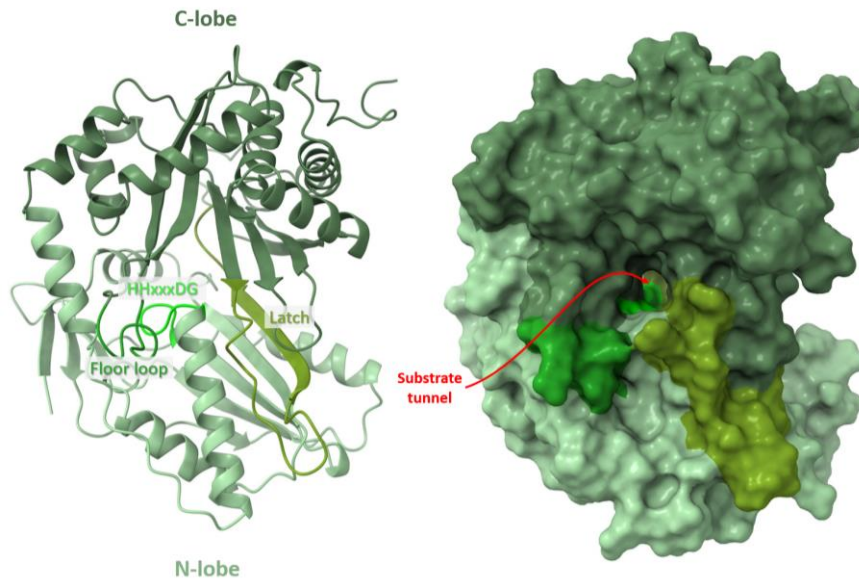

**Figure S8: Structural model of Crz1-C<sub>2</sub> seen from donor side.** Substrate tunnel, floor loop and latch are highlighted. Visualization was done using ChimeraX [11].

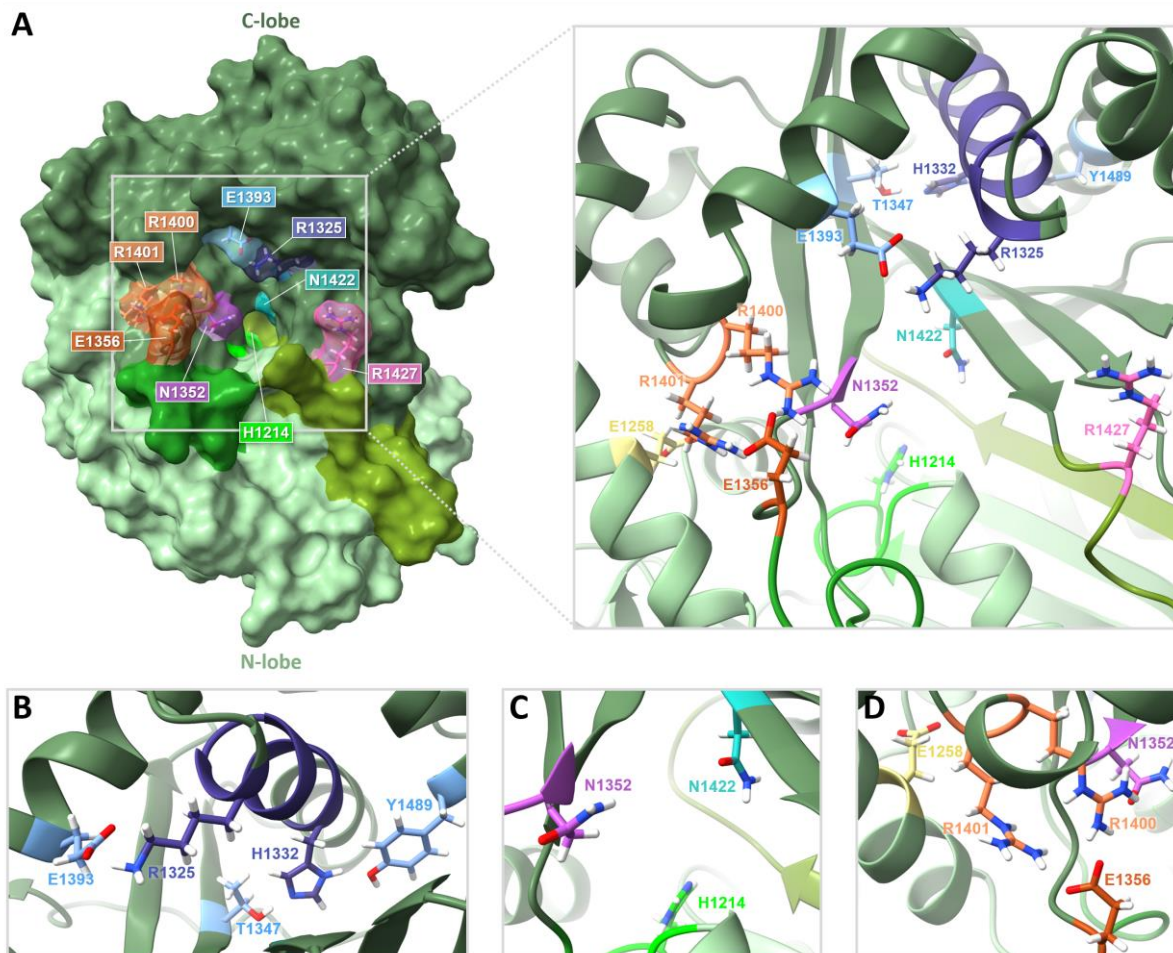

**Figure S9: Structural model of Crz1-C<sub>2</sub> with highlighted conserved residues.** Shown is a close-up view of the substrate tunnel seen from donor side (A) shown from different angles of the model (B-D). Visualization was done using ChimeraX [11].

**Table S3: Presence of crz homologues in BGCs from the BiG-SCAPE network analysis.** Colors of labels correspond to nodes in the network in Figure S10. NCBI accession numbers can be retrieved from Table S4.

- + homologous gene is present  
 ++ duplicated homologous gene is present  
 (+) gene with analogous function is present more distantly  
 - no homologous gene found
- ? no prediction on presence of homologous genes  
 f genes form a fused gene  
 d gene is divided  
 O Crz1<sub>AGly</sub> bears an integrated oxidase domain

| Clade I – all corallorazine BGC genes |                                       | crz             |                |                |                |                |   |    |   |
|---------------------------------------|---------------------------------------|-----------------|----------------|----------------|----------------|----------------|---|----|---|
|                                       |                                       | 1               | 2              | 3              | 4              | 5              | 6 | 7  | 8 |
| A1                                    | <i>Corallococcus coralloides</i>      | +               | +              | +              | +              | +              | + | +  | + |
| A2                                    | <i>Corallococcus exiguus</i>          | +               | +              | +              | +              | +              | + | +  | + |
| A3                                    | <i>Corallococcus llansteffanensis</i> | +               | +              | +              | +              | +              | + | +  | + |
| A4                                    | <i>Corallococcus aberystwythensis</i> | +               | +              | +              | +              | +              | + | +  | + |
| A5                                    | <i>Corallococcus praedator</i>        | +               | +              | +              | +              | +              | + | +  | + |
| A6                                    | <i>Corallococcus</i> sp. CA031C       | +               | +              | +              | +              | +              | + | +  | + |
| A7                                    | <i>Corallococcus</i> sp. CA047B       | +               | +              | +              | +              | +              | + | +  | + |
| A8                                    | <i>Corallococcus sicarius</i>         | +               | +              | +              | +              | +              | + | +  | + |
| A9                                    | <i>Myxococcaceae bacterium</i>        | +               | +              | +              | +              | +              | + | +  | + |
| A10                                   | <i>Cellulomonas phragmiteti</i>       | +               | +              | +              | +              | +              | + | +  | + |
| A11                                   | <i>Methylobacter tundripaludum</i>    | +               | + <sup>f</sup> | + <sup>f</sup> | +              | +              | + | +  | + |
| A12                                   | <i>Streptomyces tricolor</i>          | +               | +              | +              | +              | +              | + | ++ | + |
| A13                                   | <i>Streptomyces hokutonensis</i>      | +               | +              | +              | +              | +              | + | ++ | + |
| A14                                   | <i>Streptomyces echinatus</i>         | +               | +              | +              | +              | +              | + | ++ | + |
| A15                                   | <i>Streptomyces</i> sp. CNQ-509       | +               | +              | +              | +              | +              | + | ++ | + |
| A16                                   | <i>Streptomyces</i> sp. CNZ287        | +               | +              | +              | +              | +              | + | ++ | + |
| A17                                   | <i>Streptomyces mexicanus</i>         | +               | +              | +              | +              | +              | + | ++ | + |
| A18                                   | <i>Streptomyces</i> sp. FBKL.4005     | +               | +              | +              | +              | +              | + | ++ | + |
| A19                                   | <i>Streptomyces reticuli</i>          | +               | +              | +              | +              | +              | + | ++ | + |
| A20                                   | <i>Streptomyces</i> sp. EAS-AB2608    | +               | +              | +              | +              | +              | + | ++ | + |
| A21                                   | <i>Streptomyces</i> sp. PBH53         | +               | +              | +              | +              | +              | + | ++ | + |
| A22                                   | <i>Streptomyces tsukubaensis</i>      | +               | +              | +              | +              | +              | + | ++ | + |
| A23                                   | <i>Streptomyces tsukubaensis</i>      | +               | +              | +              | +              | +              | + | ++ | + |
| A24                                   | <i>Streptomyces</i> sp. NA04227       | +               | +              | +              | +              | +              | + | ++ | + |
| A25                                   | <i>Streptomyces</i> sp. TS71-3        | +               | +              | +              | +              | +              | + | ++ | + |
| A26                                   | <i>Pseudomonas mandelii</i>           | + <sup>o</sup>  | +              | +              | +              | +              | + | +  | + |
| A27                                   | <i>Pseudomonas gingeri</i>            | + <sup>o</sup>  | +              | +              | +              | +              | + | +  | + |
| A28                                   | <i>Pseudomonas chlororaphis</i>       | + <sup>o</sup>  | +              | +              | +              | +              | + | +  | + |
| A29                                   | <i>Deinococcus cellulosilyticus</i>   | + <sup>o</sup>  | +              | +              | +              | +              | + | +  | + |
| A30                                   | <i>Serratia plymuthica</i>            | + <sup>o</sup>  | +              | +              | +              | +              | + | +  | + |
| A31                                   | <i>Serratia plymuthica</i>            | + <sup>o</sup>  | +              | +              | +              | +              | + | +  | + |
| A32                                   | <i>Serratia plymuthica</i>            | + <sup>o</sup>  | +              | +              | +              | +              | + | +  | + |
| A33                                   | <i>Serratia plymuthica</i>            | + <sup>o</sup>  | +              | +              | +              | +              | + | +  | + |
| A34                                   | <i>Serratia</i> sp. PAMC26656         | + <sup>o</sup>  | +              | +              | +              | +              | + | +  | + |
| A35                                   | <i>Serratia plymuthica</i>            | + <sup>o</sup>  | +              | +              | +              | +              | + | +  | + |
| A36                                   | <i>Serratia plymuthica</i>            | + <sup>o</sup>  | +              | +              | +              | +              | + | +  | + |
| A37                                   | <i>Serratia plymuthica</i>            | + <sup>o</sup>  | +              | +              | +              | +              | + | +  | + |
| A38                                   | <i>Serratia plymuthica</i>            | + <sup>o</sup>  | +              | +              | +              | +              | + | +  | + |
| A39                                   | <i>Serratia plymuthica</i>            | + <sup>o</sup>  | +              | +              | +              | +              | + | +  | + |
| A40                                   | <i>Serratia marcescens</i>            | + <sup>o</sup>  | +              | +              | +              | +              | + | +  | + |
| A41                                   | <i>Serratia marcescens</i>            | + <sup>o</sup>  | +              | +              | +              | +              | + | +  | + |
| A42                                   | <i>Serratia marcescens</i>            | + <sup>o</sup>  | +              | +              | +              | +              | + | +  | + |
| A43                                   | <i>Klebsiella oxytoca</i>             | + <sup>o</sup>  | +              | +              | +              | +              | + | +  | + |
| A44                                   | <i>Serratia rubidaea</i>              | + <sup>o</sup>  | +              | +              | +              | +              | + | +  | + |
| A45                                   | <i>Serratia rubidaea</i>              | + <sup>od</sup> | +              | +              | + <sup>d</sup> | + <sup>d</sup> | + | +  | + |

| Clade II –corallorazine NRPS-genes       |                                                           | crz             |                |     |   |   |   |                |    |
|------------------------------------------|-----------------------------------------------------------|-----------------|----------------|-----|---|---|---|----------------|----|
|                                          |                                                           | 1               | 2              | 3   | 4 | 5 | 6 | 7              | 8  |
| B1                                       | <i>Streptomyces buecheriae</i>                            | + <sup>o</sup>  | +              | -   | - | - | - | +              | -  |
| B2                                       | <i>Streptomyces buecheriae</i>                            | + <sup>o</sup>  | +              | -   | - | - | - | +              | -  |
| B3                                       | <i>Streptomyces buecheriae</i>                            | + <sup>o</sup>  | + <sup>f</sup> | -   | - | - | - | + <sup>f</sup> | -  |
| B4                                       | <i>Streptomyces buecheriae</i>                            | + <sup>o</sup>  | + <sup>f</sup> | -   | - | - | - | + <sup>f</sup> | -  |
| B5                                       | <i>Streptomyces</i> sp. CB02980                           | + <sup>o</sup>  | +              | -   | - | - | - | +              | -  |
| B6                                       | <i>Streptomyces ochraceiscleroticus</i>                   | + <sup>o</sup>  | +              | -   | - | - | - | +              | ++ |
| B7                                       | <i>Streptomyces roseicoloratus</i>                        | + <sup>o</sup>  | +              | -   | - | - | - | +              | ++ |
| B8                                       | <i>Streptomyces nashvillensis</i>                         | + <sup>o</sup>  | +              | -   | - | - | - | +              | ++ |
| B9                                       | <i>Streptomyces tanashiensis</i>                          | + <sup>o</sup>  | +              | -   | - | - | - | +              | ++ |
| B10                                      | <i>Streptomyces albus</i>                                 | + <sup>o</sup>  | + <sup>f</sup> | -   | - | - | - | + <sup>f</sup> | +  |
| B11                                      | <i>Streptomyces albus</i>                                 | + <sup>o</sup>  | + <sup>f</sup> | -   | - | - | - | + <sup>f</sup> | +  |
| B12                                      | <i>Streptomyces albus</i>                                 | + <sup>o</sup>  | + <sup>f</sup> | -   | - | - | - | + <sup>f</sup> | +  |
| B13                                      | <i>Actinokineospora baliensis</i>                         | + <sup>o</sup>  | +              | (+) | - | - | - | +              | +  |
| B14                                      | <i>Kitasatospora indigofera</i>                           | + <sup>o</sup>  | +              | -   | - | - | - | +              | ++ |
| B15                                      | <i>Kitasatospora cheerisanensis</i>                       | + <sup>Od</sup> | + <sup>f</sup> | -   | - | - | - | +              | ?  |
| B16                                      | <i>Kutzneria buriramensis</i>                             | -               | +              | +   | + | + | + | (+)            | -  |
| B17                                      | <i>Rhodococcus</i> sp. 852002-51564                       | + <sup>o</sup>  | +              | -   | + | + | + |                |    |
| B18                                      | <i>Saccharopolyspora</i> sp. 7K502                        | + <sup>Od</sup> | +              | +   | ? | ? | ? | ?              | ?  |
| B19                                      | <i>Burkholderia glumae</i>                                | +               | ?              | ?   | ? | ? | ? | ?              | ?  |
| B20                                      | <i>Nocardioopsis salina</i>                               | +               | ?              | ?   | ? | ? | ? | ?              | ?  |
| Clade III – non-corallorazine NRPS-genes |                                                           | crz             |                |     |   |   |   |                |    |
|                                          |                                                           | 1               | 2              | 3   | 4 | 5 | 6 | 7              | 8  |
| C1                                       | <i>Streptomyces</i> sp. CS149                             | -               | -              | +   | + | + | + | -              | -  |
| C2                                       | <i>Streptomyces olivaceus</i>                             | -               | -              | +   | + | - | + | -              | -  |
| C3                                       | <i>Streptomyces tendae</i>                                | -               | -              | +   | + | - | + | -              | -  |
| C4                                       | <i>Streptomyces</i> sp. M56                               | -               | -              | +   | + | - | + | -              | -  |
| C5                                       | <i>Streptomyces</i> sp. MH60                              | -               | -              | +   | + | - | + | -              | -  |
| C6                                       | <i>Streptomyces griseorubens</i>                          | -               | -              | +   | + | - | + | -              | -  |
| C7                                       | <i>Streptomyces</i> sp. VN1                               | -               | -              | +   | + | - | + | -              | -  |
| C8                                       | <i>Streptomyces parvulus</i>                              | -               | -              | +   | + | - | + | -              | -  |
| C9                                       | <i>Streptomyces</i> sp. RK74B                             | -               | -              | +   | + | - | + | -              | -  |
| C10                                      | <i>Streptomyces griseorubiginosus</i>                     | -               | -              | +   | + | + | + | -              | -  |
| C11                                      | <i>Streptomyces badius</i>                                | -               | -              | +   | + | + | + | -              | -  |
| C12                                      | uncultured bacterium                                      | -               | -              | +   | + | + | + | (+)            | -  |
| C13                                      | <i>Streptomyces</i> sp. or43                              | -               | -              | +   | + | + | - | -              | -  |
| C14                                      | <i>Streptomyces</i> sp. TYQ1024                           | -               | -              | +   | + | + | + | -              | -  |
| C15                                      | <i>Streptomyces</i> sp. SID5643                           | -               | -              | -   | + | + | + | (+)            | -  |
| C16                                      | <i>Streptomyces ambofaciens</i>                           | -               | -              | +   | + | + | + | -              | -  |
| C17                                      | <i>Streptomyces ambofaciens</i>                           | -               | -              | +   | + | + | + | -              | -  |
| C18                                      | <i>Streptomyces luteoverticillatus</i>                    | -               | -              | +   | + | + | + | -              | -  |
| C19                                      | <i>Streptomyces janthinus</i>                             | -               | -              | +   | + | + | + | -              | -  |
| C20                                      | <i>Streptomyces collinus</i>                              | -               | -              | +   | + | + | + | -              | -  |
| C21                                      | <i>Streptomyces bellus</i>                                | -               | -              | +   | + | + | + | -              | -  |
| C22                                      | <i>Streptomyces coeruleorubidus</i>                       | -               | -              | +   | + | + | + | -              | -  |
| C23                                      | <i>Streptomyces violaceochromogenes</i>                   | -               | -              | +   | + | + | + | -              | -  |
| C24                                      | <i>Streptomyces achromogenes</i> subsp. <i>rubradiris</i> | -               | -              | +   | + | + | + | -              | -  |
| C25                                      | <i>Streptomyces</i> sp. WAC05858                          | -               | -              | +   | + | + | + | -              | -  |
| C26                                      | <i>Streptomyces</i> sp. AgN23                             | -               | -              | +   | + | + | + | -              | -  |
| C27                                      | <i>Streptomyces</i> sp. 11-1-2                            | -               | -              | +   | + | + | + | -              | -  |
| C28                                      | <i>Streptomyces mediolani</i>                             | -               | -              | +   | + | + | + | -              | -  |
| C29                                      | <i>Streptomyces</i> sp. SID5614                           | -               | -              | +   | + | + | + | -              | -  |
| C30                                      | <i>Actinomadura</i> sp. KC06                              | -               | -              | +   | + | + | + | -              | -  |
| C31                                      | <i>Actinomadura macra</i>                                 | -               | -              | +   | + | + | + | -              | -  |
| C32                                      | <i>Plantactinospora mayteni</i>                           | -               | -              | +   | + | + | + | -              | -  |
| C33                                      | <i>Plantactinospora</i> sp. BB1                           | -               | -              | +   | + | + | + | -              | -  |
| C34                                      | <i>Plantactinospora</i> sp. BC1                           | -               | -              | +   | + | + | + | -              | -  |
| C35                                      | <i>Plantactinospora endophytica</i>                       | -               | -              | +   | + | + | + | -              | -  |

|     |                                      |   |   |   |   |   |   |     |     |
|-----|--------------------------------------|---|---|---|---|---|---|-----|-----|
| C36 | <i>Plantactinospora</i> sp. CNZ320   | - | - | + | + | + | + | -   | -   |
| C37 | <i>Plantactinospora</i> sp. CNZ321   | - | - | + | + | + | + | -   | -   |
| C38 | <i>Plantactinospora soyae</i>        | - | - | + | + | + | + | -   | -   |
| C39 | <i>Streptomyces</i> sp. 67           | - | - | + | + | + | + | -   | -   |
| C40 | <i>Goodfellowiella</i> sp. AN110305  | - | - | + | + | + | + | -   | -   |
| C41 | <i>Lentzea kentuckyensis</i>         | - | - | + | + | + | + | -   | -   |
| C42 | <i>Streptomyces indicus</i>          | - | - | + | + | + | + | (+) | (+) |
| C43 | <i>Streptomyces</i> sp. CB03911      | - | - | + | + | + | + | (+) | -   |
| C44 | <i>Streptomyces</i> sp. SID4936      | - | - | + | + | + | + | (+) | -   |
| C45 | <i>Streptomyces actuosus</i>         | - | - | + | + | + | + | (+) | -   |
| C46 | <i>Streptomyces</i> sp. CRXT-Y-14    | - | - | + | + | + | + | (+) | -   |
| C47 | <i>Streptomyces griseosporus</i>     | - | - | + | + | + | + | (+) | -   |
| C48 | <i>Streptomyces</i> sp. CB09001      | - | - | + | + | + | + | (+) | (+) |
| C49 | <i>Kitasatospora</i> sp. MMS16-BH015 | - | - | + | + | + | + | (+) | -   |
| C50 | <i>Streptomyces daqingensis</i>      | - | - | + | + | + | + | (+) | -   |
| C51 | <i>Streptomyces</i> sp. 69           | - | - | + | + | + | + | (+) | -   |
| C52 | <i>Streptomyces hirosheimensis</i>   | - | - | + | + | + | + | (+) | (+) |
| C53 | <i>Streptomyces flaveus</i>          | - | - | + | + | + | + | (+) | (+) |
| C54 | <i>Streptomyces</i> sp. 2231.1       | - | - | + | + | + | + | (+) | (+) |
| C55 | <i>Streptomyces</i> sp. CB01883      | - | - | + | + | + | + | (+) | (+) |
| C56 | <i>Streptomyces</i> sp. 840.1        | - | - | + | + | + | + | (+) | (+) |
| C57 | <i>Streptomyces</i> sp. 5112.2       | - | - | + | + | + | + | (+) | (+) |
| C58 | <i>Streptomyces</i> sp. PanSC9       | - | - | + | + | + | + | (+) | (+) |
| C59 | <i>Streptomyces</i> sp. SID9727      | - | - | + | + | + | + | (+) | -   |
| C60 | <i>Streptomyces</i> sp. S3(2020)     | - | - | + | + | + | + | -   | -   |
| C61 | <i>Actinomadura logoneensis</i>      | - | - | + | + | + | + | -   | -   |
| C62 | <i>Streptomyces canus</i>            | - | - | + | + | + | + | -   | -   |
| C63 | <i>Streptomyces</i> sp. Root369      | - | - | + | + | + | + | -   | -   |
| C64 | <i>Streptomyces</i> sp. SID8350      | - | - | + | + | + | + | -   | -   |
| C65 | <i>Streptomyces</i> sp. SID8356      | - | - | + | + | + | + | -   | -   |
| C66 | <i>Streptomyces</i> sp. SID8352      | - | - | + | + | + | + | -   | -   |
| C67 | <i>Streptomyces</i> sp. 196(2019)    | - | - | + | + | + | + | -   | -   |
| C68 | <i>Streptomyces cavourensis</i>      | - | - | + | + | + | + | -   | -   |
| C69 | <i>Streptomyces</i> sp. KAI-26       | - | - | + | + | + | + | -   | -   |
| C70 | <i>Streptomyces</i> sp. CAI-24       | - | - | + | + | + | + | -   | -   |
| C71 | <i>Streptomyces</i> sp. SID8359      | - | - | + | + | + | + | -   | -   |
| C72 | <i>Streptomyces</i> sp. DvalAA-19    | - | - | + | + | + | + | -   | -   |
| C73 | <i>Streptomyces</i> sp. CFMR 7       | - | - | + | + | + | + | -   | -   |
| C74 | <i>Streptosporangium subroseum</i>   | - | - | + | + | + | + | -   | -   |
| C75 | <i>Streptomyces spongiae</i>         | - | - | + | + | + | + | -   | -   |
| C76 | <i>Microbispora</i> sp. RL4-1S       | - | - | + | + | + | + | -   | -   |
| C77 | <i>Phytohabitans rumicis</i>         | - | - | + | + | + | + | -   | -   |
| C78 | <i>Streptomyces pharetrae</i>        | - | - | + | + | ? | ? | ?   | ?   |
| C79 | <i>Streptomyces zaomyceticus</i>     | - | - | - | + | - | - | -   | -   |
| C80 | <i>Streptomyces</i> sp. NWU49        | - | - | - | + | + | + | -   | -   |
| C81 | <i>Salinispora tropica</i>           | - | - | + | + | + | + | (+) | (+) |

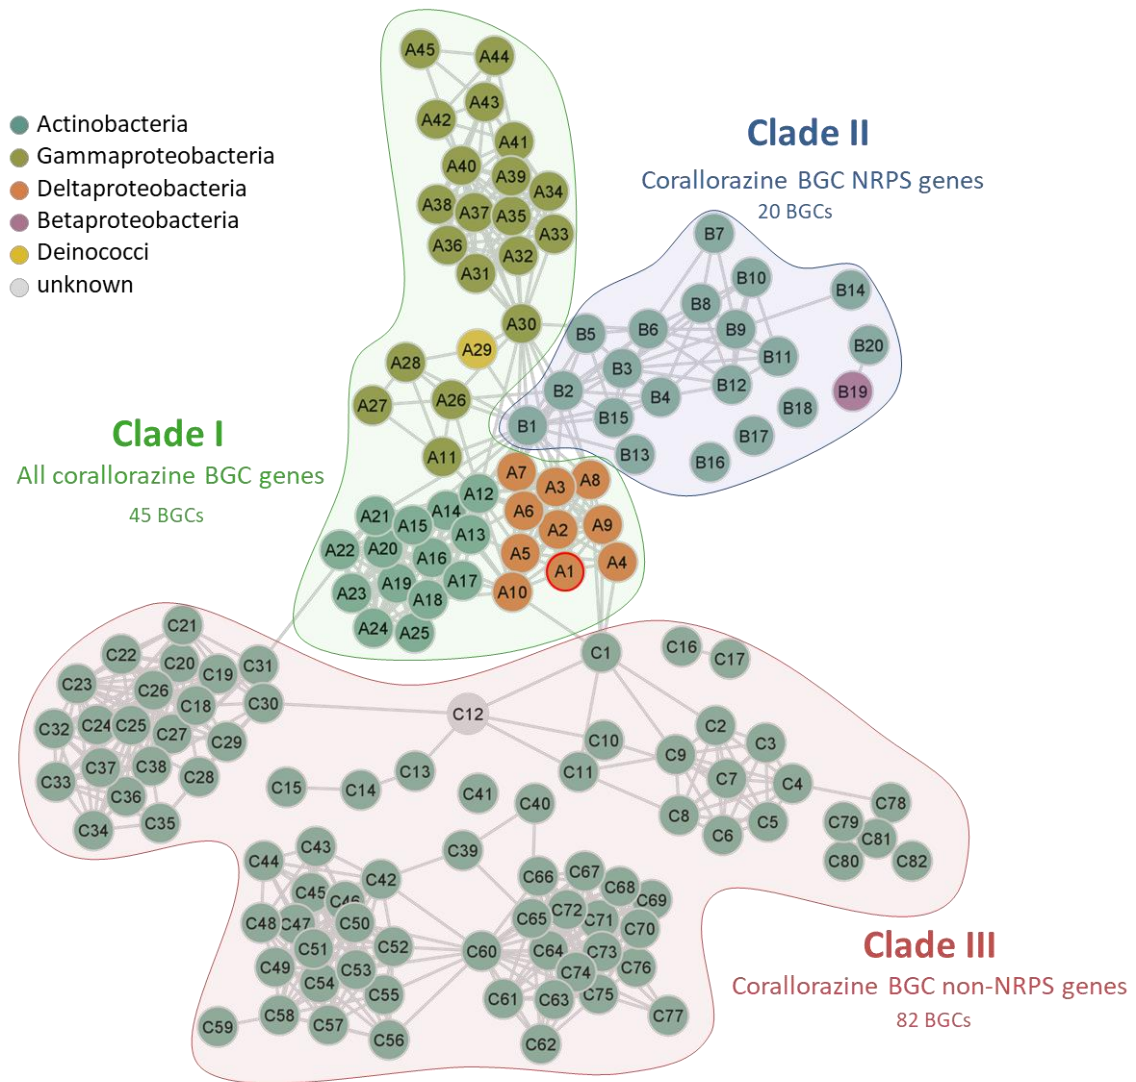

**Figure S10: Cytoscape network of homologous corallorazine BGCs.** Nodes correspond to BGCs containing at least one gene that is homologous to a gene in the corallorazine BGC (A1, red circle outline). Information on host strain and presence of *crz1-8* homologues is displayed in Table S3. Classification in clade I, II or III is indicated by colored areas. Examples for characteristic clusters from these clades are shown in Figure S11. Length of the connections between nodes correlates with the degree of relationship according to BiG-SCAPE analysis.

### Clade I – All corallorazine NRPS genes

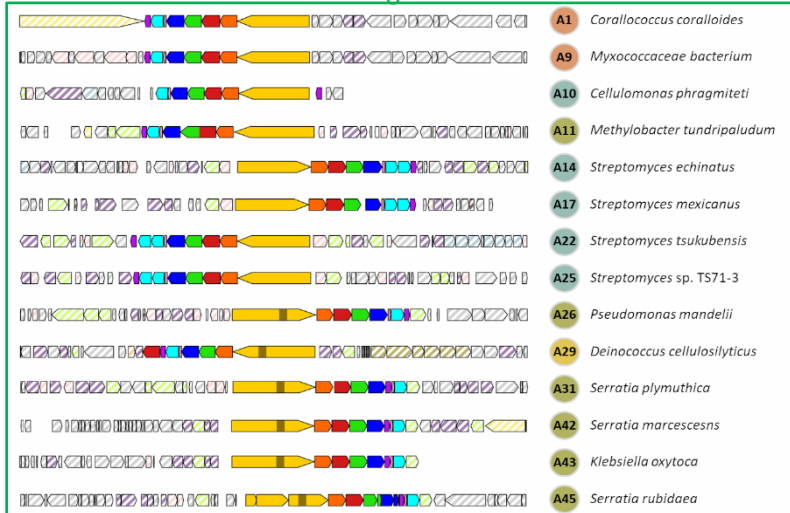

#### Taxonomic groups

- Actinobacteria
- Gammaproteobacteria
- Deltaproteobacteria
- Betaproteobacteria
- Deinococci
- unknown

#### Corallorazine-BGC homologous genes

- |                |                                |
|----------------|--------------------------------|
| NRPS genes     | ● <i>crz1</i>                  |
|                | ● <i>crz1</i> with A-OX domain |
|                | ● <i>crz2</i>                  |
|                | ● <i>crz3</i>                  |
| non-NRPS genes | ● <i>crz4</i>                  |
|                | ● <i>crz5</i>                  |
|                | ● <i>crz6</i>                  |
|                | ● <i>crz7</i>                  |
|                | ● <i>crz8</i>                  |

### Clade II – Corallorazine BGC NRPS genes

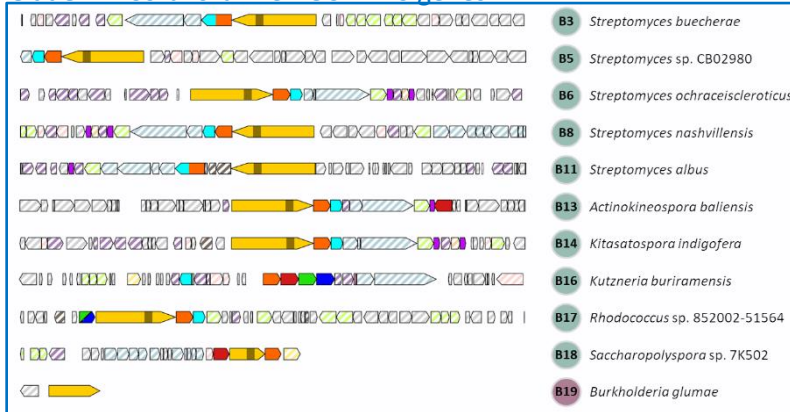

#### Neighbouring genes

- NRPS
- PKS
- Other natural product BGC type
- Tailoring
- Pptase
- Transport
- Regulation
- Transposon
- Other/unknown function

### Clade III – Corallorazine BGC non-NRPS genes

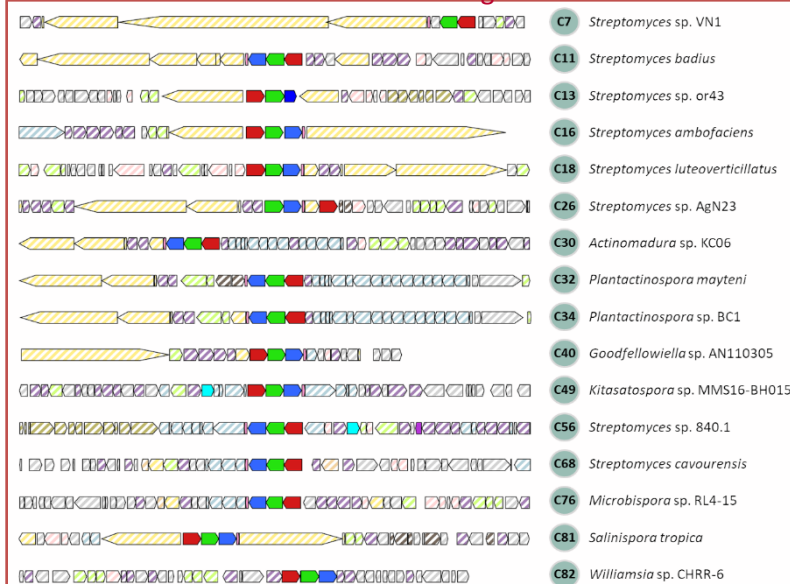

**Figure S11: Examples of characteristic corallorazine-like BGCs from clade I-III.** BGCs are listed with their respective node label from the network in Figure S10 and Table S3. Homologous genes to *crz1-8* from the original corallorazine BGC (BGC A1 in Clade I) are color-coded and genes in adjacent regions are labeled differently by functionality.



**Table S4: antiSMASH regions of BGCs with corallorazine-like genes.** The corresponding label of the node from the BiG-SCAPE analysis in and is given, along with the NCBI accession number of the nucleotide and the region detected by antiSMASH 7.0 [12], where the respective BGC is located. Regions marked with “\*” are at the edge of a nucleotide contig and miss some part of information, which was placed on another contig.

| Node label                                     | NCBI Accession    | antiSMASH Region | Species                                 | Class               |
|------------------------------------------------|-------------------|------------------|-----------------------------------------|---------------------|
| <b>Clade I – All corallorazine BGC genes</b>   |                   |                  |                                         |                     |
| A1                                             | CP034669.1        | 18               | <i>Corallococcus coralloides</i>        | Deltaproteobacteria |
| A2                                             | JAFIMT010000001.1 | 14               | <i>Corallococcus exiguus</i>            | Deltaproteobacteria |
| A3                                             | NZ_RAWB01000070   | 1*               | <i>Corallococcus llansteffanensis</i>   | Deltaproteobacteria |
| A4                                             | RAWK01000026.1    | 1*               | <i>Corallococcus aberystwythensis</i>   | Deltaproteobacteria |
| A5                                             | RAWI01000354.1    | 1*               | <i>Corallococcus praedator</i>          | Deltaproteobacteria |
| A6                                             | RAWH01000308.1.1  | 1*               | <i>Corallococcus</i> sp. CA031C         | Deltaproteobacteria |
| A7                                             | NZ_RAWD01000128   | 1*               | <i>Corallococcus</i> sp. CA047B         | Deltaproteobacteria |
| A8                                             | NZ_RAWG01000099   | 1                | <i>Corallococcus sicarius</i>           | Deltaproteobacteria |
| A9                                             | SECN01000053.1    | 1                | <i>Myxococcaceae</i> bacterium          | Deltaproteobacteria |
| A10                                            | BONP01000021.1    | 1                | <i>Cellulomonas phragmiteti</i>         | Actinobacteria      |
| A11                                            | PTIZ01000002.1    | 1                | <i>Methylobacter tundripaludum</i>      | Gammaproteobacteria |
| A12                                            | NZ_MUMF01000536   | 1*               | <i>Streptomyces tricolor</i>            | Actinobacteria      |
| A13                                            | NZ_BARG01000051   | 1                | <i>Streptomyces hokutonensis</i>        | Actinobacteria      |
| A14                                            | JACHJK010000001   | 3                | <i>Streptomyces echinatus</i>           | Actinobacteria      |
| A15                                            | NZ_CP011492.1     | 3                | <i>Streptomyces</i> sp. CNQ-509         | Actinobacteria      |
| A16                                            | NZ_VISV01000013   | 1                | <i>Streptomyces</i> sp. CNZ287          | Actinobacteria      |
| A17                                            | JACMHY010000005   | 3                | <i>Streptomyces mexicanus</i>           | Actinobacteria      |
| A18                                            | NZ_NPKF010000001  | 19               | <i>Streptomyces</i> sp. FBKL.4005       | Actinobacteria      |
| A19                                            | LN997842.1        | 15               | <i>Streptomyces reticuli</i>            | Actinobacteria      |
| A20                                            | AP024135.1        | 28               | <i>Streptomyces</i> sp. EAS-AB2608      | Actinobacteria      |
| A21                                            | NZ_CP011799.1     | 3                | <i>Streptomyces</i> sp. PBH53           | Actinobacteria      |
| A22                                            | NZ_CP045178.1     | 6                | <i>Streptomyces tsukubaensis</i>        | Actinobacteria      |
| A23                                            | MVFC01000001.     | 1                | <i>Streptomyces tsukubaensis</i>        | Actinobacteria      |
| A24                                            | NZ_CP054918.1     | 19               | <i>Streptomyces</i> sp. NA04227         | Actinobacteria      |
| A25                                            | BNEL01000003.1    | 3                | <i>Streptomyces</i> sp. TS71-3          | Actinobacteria      |
| A26                                            | NZ_RCZA01000006   | 1                | <i>Pseudomonas mandelii</i>             | Gammaproteobacteria |
| A27                                            | JACAOS010000033   | 2                | <i>Pseudomonas gingeri</i>              | Gammaproteobacteria |
| A28                                            | JAHTLD010000001   | 2                | <i>Pseudomonas chlororaphis</i>         | Gammaproteobacteria |
| A29                                            | NZ_BJXB01000010   | 1                | <i>Deinococcus cellulosilyticus</i>     | Deinococci          |
| A30                                            | MQML01000149.1    | 1*               | <i>Serratia plymuthica</i>              | Gammaproteobacteria |
| A31                                            | CP012096.1        | 6                | <i>Serratia plymuthica</i>              | Gammaproteobacteria |
| A32                                            | CP006566.1        | 3                | <i>Serratia plymuthica</i>              | Gammaproteobacteria |
| A33                                            | CP012097.1        | 3                | <i>Serratia plymuthica</i>              | Gammaproteobacteria |
| A34                                            | JAEHKA010000016   | 1                | <i>Serratia</i> sp. PAMC26656           | Gammaproteobacteria |
| A35                                            | JAAQRN010000002   | 2                | <i>Serratia plymuthica</i>              | Gammaproteobacteria |
| A36                                            | CP002773.1        | 1                | <i>Serratia plymuthica</i>              | Gammaproteobacteria |
| A37                                            | JADCNO010000024   | 1                | <i>Serratia plymuthica</i>              | Gammaproteobacteria |
| A38                                            | JAHSV010000004    | 2                | <i>Serratia plymuthica</i>              | Gammaproteobacteria |
| A39                                            | CP007439.1        | 12               | <i>Serratia plymuthica</i>              | Gammaproteobacteria |
| A40                                            | RCDL01000433.1    | 1                | <i>Serratia marcescens</i>              | Gammaproteobacteria |
| A41                                            | JAFIZV010000023   | 1                | <i>Serratia marcescens</i>              | Gammaproteobacteria |
| A42                                            | JAHSX010000013    | 1                | <i>Serratia marcescens</i>              | Gammaproteobacteria |
| A43                                            | FKZE01000007.1    | 1                | <i>Klebsiella oxytoca</i>               | Gammaproteobacteria |
| A44                                            | CP065640.1        | 16               | <i>Serratia rubidaea</i>                | Gammaproteobacteria |
| A45                                            | LR590463.1        | 11               | <i>Serratia rubidaea</i>                | Gammaproteobacteria |
| <b>Clade II – Corallorazine BGC NRPS genes</b> |                   |                  |                                         |                     |
| B1                                             | JACOFO010000661   | 1*               | <i>Streptomyces buecherae</i>           | Actinobacteria      |
| B2                                             | JACOF010000095    | 1*               | <i>Streptomyces buecherae</i>           | Actinobacteria      |
| B3                                             | NZ_CP054929.1     | 2                | <i>Streptomyces buecherae</i>           | Actinobacteria      |
| B4                                             | NZ_CP060404.1     | 30               | <i>Streptomyces buecherae</i>           | Actinobacteria      |
| B5                                             | JACSCH010000002   | 1*               | <i>Streptomyces</i> sp. CB02980         | Actinobacteria      |
| B6                                             | NZ_JOAX01000004   | 1                | <i>Streptomyces ochraceiscleroticus</i> | Actinobacteria      |

|                                                    |                 |    |                                                           |                |
|----------------------------------------------------|-----------------|----|-----------------------------------------------------------|----------------|
| B7                                                 | NZ_SDOY01000175 | 2  | <i>Streptomyces roseicoloratus</i>                        | Actinobacteria |
| B8                                                 | BMUH01000002.1  | 1  | <i>Streptomyces nashvillensis</i>                         | Actinobacteria |
| B9                                                 | BMRZ01000004.1  | 2  | <i>Streptomyces tanashiensis</i>                          | Actinobacteria |
| B10                                                | CP010519.1      | 1  | <i>Streptomyces albus</i>                                 | Actinobacteria |
| B11                                                | CP033071.1      | 1  | <i>Streptomyces albus</i>                                 | Actinobacteria |
| B12                                                | CP016825.1      | 1  | <i>Streptomyces albus</i>                                 | Actinobacteria |
| B13                                                | JAFBCK010000001 | 26 | <i>Actinokineospora baliensis</i>                         | Actinobacteria |
| B14                                                | BNBO01000006.1  | 1  | <i>Kitasatospora indigofera</i>                           | Actinobacteria |
| B15                                                | JNBY01000152.1  | 1* | <i>Kitasatospora cheerisanensis</i>                       | Actinobacteria |
| B16                                                | QUNO01000026.1  | 1  | <i>Kutzneria buriramensis</i>                             | Actinobacteria |
| B17                                                | LZMJ01000006.1  | 1  | <i>Rhodococcus</i> sp. 852002-51564                       | Actinobacteria |
| B18                                                | NZ_SMKW01000035 | 1* | <i>Saccharopolyspora</i> sp. 7K502                        | Actinobacteria |
| B19                                                | JTDQ01000248.1  | 1* | <i>Burkholderia glumae</i>                                | Proteobacteria |
| B20                                                | NZ_ANBF01000120 | 1* | <i>Nocardiopsis salina</i>                                | Actinobacteria |
| <b>Clade III – Coralloazine BGC non-NRPS genes</b> |                 |    |                                                           |                |
| C1                                                 | PVZY01000056.1  | 1  | <i>Streptomyces</i> sp. CS149                             | Actinobacteria |
| C2                                                 | NZ_JOFH01000027 | 1  | <i>Streptomyces olivaceus</i>                             | Actinobacteria |
| C3                                                 | BMUY01000010.1  | 1* | <i>Streptomyces tendae</i>                                | Actinobacteria |
| C4                                                 | CP025018.1      | 8  | <i>Streptomyces</i> sp. M56                               | Actinobacteria |
| C5                                                 | MULI01000006.1  | 1* | <i>Streptomyces</i> sp. MH60                              | Actinobacteria |
| C6                                                 | BMTJ01000005.1  | 5  | <i>Streptomyces griseorubens</i>                          | Actinobacteria |
| C7                                                 | CP036534.1      | 20 | <i>Streptomyces</i> sp. VN1                               | Actinobacteria |
| C8                                                 | NZ_QQBH01000019 | 1* | <i>Streptomyces parvulus</i>                              | Actinobacteria |
| C9                                                 | JAGPYE010000007 | 1* | <i>Streptomyces</i> sp. RK74B                             | Actinobacteria |
| C10                                                | RJKZ01000001.1  | 16 | <i>Streptomyces griseorubiginosus</i>                     | Actinobacteria |
| C11                                                | NZ_BMSZ01000003 | 1  | <i>Streptomyces badius</i>                                | Actinobacteria |
| C12                                                | MK060022.1      | 1  | uncultured bacterium                                      | -              |
| C13                                                | NZ_RDBK01000025 | 1  | <i>Streptomyces</i> sp. or43                              | Actinobacteria |
| C14                                                | JACLQY010000057 | 1  | <i>Streptomyces</i> sp. TYQ1024                           | Actinobacteria |
| C15                                                | WWIC01000086.1  | 1* | <i>Streptomyces</i> sp. SID5643                           | Actinobacteria |
| C16                                                | CP012949.1      | 14 | <i>Streptomyces ambofaciens</i>                           | Actinobacteria |
| C17                                                | CP012382.1      | 14 | <i>Streptomyces ambofaciens</i>                           | Actinobacteria |
| C18                                                | NZ_CP034587.1   | 19 | <i>Streptomyces luteovercillatus</i>                      | Actinobacteria |
| C19                                                | BMTM01000004.1  | 2  | <i>Streptomyces janthinus</i>                             | Actinobacteria |
| C20                                                | JACHLX010000001 | 9  | <i>Streptomyces collinus</i>                              | Actinobacteria |
| C21                                                | BMSO01000001.1  | 1  | <i>Streptomyces bellus</i>                                | Actinobacteria |
| C22                                                | CP023694.1      | 15 | <i>Streptomyces coerulescens</i>                          | Actinobacteria |
| C23                                                | BMUO01000004.1  | 3  | <i>Streptomyces violaceochromogenes</i>                   | Actinobacteria |
| C24                                                | BNCB01000007.1  | 3  | <i>Streptomyces achromogenes</i> subsp. <i>rubradiris</i> | Actinobacteria |
| C25                                                | RPRR01000011.1  | 1  | <i>Streptomyces</i> sp. WAC05858                          | Actinobacteria |
| C26                                                | CP007153.2      | 31 | <i>Streptomyces</i> sp. AgN23                             | Actinobacteria |
| C27                                                | CP022545.1      | 17 | <i>Streptomyces</i> sp. 11-1-2                            | Actinobacteria |
| C28                                                | NZ_JOJK01000031 | 1  | <i>Streptomyces mediolani</i>                             | Actinobacteria |
| C29                                                | WWID01000099.1  | 1  | <i>Streptomyces</i> sp. SID5614                           | Actinobacteria |
| C30                                                | SMKT01000002.1  | 1  | <i>Actinomadura</i> sp. KC06                              | Actinobacteria |
| C31                                                | NZ_BCQT01000018 | 3  | <i>Actinomadura macra</i>                                 | Actinobacteria |
| C32                                                | BONX01000002.1  | 1  | <i>Plantactinospora mayteni</i>                           | Actinobacteria |
| C33                                                | CP028159.1      | 1  | <i>Plantactinospora</i> sp. BB1                           | Actinobacteria |
| C34                                                | NZ_CP028158.1   | 1  | <i>Plantactinospora</i> sp. BC1                           | Actinobacteria |
| C35                                                | BONW01000039.1  | 1  | <i>Plantactinospora endophytica</i>                       | Actinobacteria |
| C36                                                | NZ_PJMP01000001 | 1  | <i>Plantactinospora</i> sp. CNZ320                        | Actinobacteria |
| C37                                                | NZ_SHKQ01000001 | 1  | <i>Plantactinospora</i> sp. CNZ321                        | Actinobacteria |
| C38                                                | JADBEB010000001 | 1  | <i>Plantactinospora soyae</i>                             | Actinobacteria |
| C39                                                | QREB01000001.1  | 25 | <i>Streptomyces</i> sp. 67                                | Actinobacteria |
| C40                                                | VUOB01000045.1  | 2  | <i>Goodfellowiella</i> sp. AN110305                       | Actinobacteria |
| C41                                                | NZ_MUYM01000003 | 1  | <i>Lentzea kentuckyensis</i>                              | Actinobacteria |
| C42                                                | NZ_FNFF01000027 | 1  | <i>Streptomyces indicus</i>                               | Actinobacteria |
| C43                                                | LWLA01000014.1  | 1  | <i>Streptomyces</i> sp. CB03911                           | Actinobacteria |
| C44                                                | WWJE01000026.1  | 1  | <i>Streptomyces</i> sp. SID4936                           | Actinobacteria |
| C45                                                | NZ_CP029788.1   | 7  | <i>Streptomyces actuosus</i>                              | Actinobacteria |
| C46                                                | CP061281.1      | 12 | <i>Streptomyces</i> sp. CRXT-Y-14                         | Actinobacteria |
| C47                                                | BNBR01000004.1  | 2  | <i>Streptomyces griseosporus</i>                          | Actinobacteria |
| C48                                                | NZ_CP026730.1   | 22 | <i>Streptomyces</i> sp. CB09001                           | Actinobacteria |
| C49                                                | CP025394.1      | 23 | <i>Kitasatospora</i> sp. MMS16-BH015                      | Actinobacteria |
| C50                                                | BMMP01000010.1  | 1  | <i>Streptomyces daqingensis</i>                           | Actinobacteria |

|     |                 |    |                                    |                |
|-----|-----------------|----|------------------------------------|----------------|
| C51 | PHUI01000001.1  | 11 | <i>Streptomyces</i> sp. 69         | Actinobacteria |
| C52 | NZ_BMUT01000017 | 1  | <i>Streptomyces hirosimensis</i>   | Actinobacteria |
| C53 | NZ_BMPQ01000032 | 1  | <i>Streptomyces flaveus</i>        | Actinobacteria |
| C54 | FNT001000001.1  | 26 | <i>Streptomyces</i> sp. 2231.1     | Actinobacteria |
| C55 | LIWA01000006.1  | 1  | <i>Streptomyces</i> sp. CB01883    | Actinobacteria |
| C56 | RJUU01000001.1  | 3  | <i>Streptomyces</i> sp. 840.1      | Actinobacteria |
| C57 | PJNA01000001.1  | 25 | <i>Streptomyces</i> sp. 5112.2     | Actinobacteria |
| C58 | RJKP01000002.1  | 7  | <i>Streptomyces</i> sp. PanSC9     | Actinobacteria |
| C59 | JAAGNI010000261 | 1  | <i>Streptomyces</i> sp. SID9727    | Actinobacteria |
| C60 | JABERD010000027 | 1  | <i>Streptomyces</i> sp. S3(2020)   | Actinobacteria |
| C61 | QURH01000180.1  | 1  | <i>Actinomadura logoneensis</i>    | Actinobacteria |
| C62 | LMW001000018.1  | 1  | <i>Streptomyces canus</i>          | Actinobacteria |
| C63 | LMDL01000004.1  | 1  | <i>Streptomyces</i> sp. Root369    | Actinobacteria |
| C64 | WWGY01000062.1  | 2  | <i>Streptomyces</i> sp. SID8350    | Actinobacteria |
| C65 | NZ_WWGV01000013 | 2  | <i>Streptomyces</i> sp. SID8356    | Actinobacteria |
| C66 | WWGX01000064.1  | 1  | <i>Streptomyces</i> sp. SID8352    | Actinobacteria |
| C67 | WSTF01000006.1  | 1  | <i>Streptomyces</i> sp. 196(2019)  | Actinobacteria |
| C68 | JAANNR010000001 | 8  | <i>Streptomyces</i> sp. KAI-26     | Actinobacteria |
| C69 | CP024957.1      | 24 | <i>Streptomyces cavourensis</i>    | Actinobacteria |
| C70 | JAANOE010000005 | 2  | <i>Streptomyces</i> sp. CAI-24     | Actinobacteria |
| C71 | WWGS01000014.1  | 6  | <i>Streptomyces</i> sp. SID8359    | Actinobacteria |
| C72 | FMCC01000165.1  | 1  | <i>Streptomyces</i> sp. DvalAA-19  | Actinobacteria |
| C73 | NZ_CP011522.1   | 9  | <i>Streptomyces</i> sp. CFMR 7     | Actinobacteria |
| C74 | FZOD01000012.1  | 1  | <i>Streptosporangium subroseum</i> | Actinobacteria |
| C75 | VJZC01000069.1  | 1  | <i>Streptomyces spongiae</i>       | Actinobacteria |
| C76 | JAFNB010000001  | 1  | <i>Microbispora</i> sp. RL4-1S     | Actinobacteria |
| C77 | NZ_BLPG01000001 | 1  | <i>Phytohabitans rumicis</i>       | Actinobacteria |
| C78 | MRYD01000172.1  | 1* | <i>Streptomyces pharetrae</i>      | Actinobacteria |
| C79 | BNBZ01000011.1  | 3  | <i>Streptomyces zaomyceticus</i>   | Actinobacteria |
| C80 | QFXB01000020.1  | 2  | <i>Streptomyces</i> sp. NWU49      | Actinobacteria |
| C81 | NZ_AZXH01000039 | 1  | <i>Salinispora tropica</i>         | Actinobacteria |
| C82 | JAHCSG010000003 | 1  | <i>Williamsia</i> sp. CHRR-6       | Actinobacteria |

**Table S5: Primers used for cloning of *crz* genes.** Restriction sites are underlined, extra stop codons are marked red.

| Name                      | Application                          | Sequence (5'→3')                               |
|---------------------------|--------------------------------------|------------------------------------------------|
| <b>Crz1.1_Ndel_for</b>    | Cloning of <i>crz1.1</i> into pET28a | TGAC <u>CATATG</u> CTTGGGACCGACACG             |
| <b>Crz1.1_HindIII_rev</b> | Cloning of <i>crz1.1</i> into pET28a | TATA <u>AAGCTT</u> <b>TCA</b> CAGCAGGGAGAAGGG  |
| <b>Crz1.2_Ndel_for</b>    | Cloning of <i>crz1.2</i> into pET28a | TAT <u>CATATG</u> CTGCGCGACGCGGAC              |
| <b>Crz1.2_HindIII_rev</b> | Cloning of <i>crz1.2</i> into pET28a | TATA <u>AAGCTT</u> <b>TCA</b> TCGCGTCTGCTCCTTC |
| <b>Crz2_Ndel_for</b>      | Cloning of <i>crz2</i> into pET28a   | TGAC <u>CATATG</u> GACGCGATGAGTGACACCT         |
| <b>Crz2_HindIII_rev</b>   | Cloning of <i>crz2</i> into pET28a   | TATA <u>AAGCTT</u> CTCAAACGCGGGCATGGGA         |

## Supplementary References

- [1] T. A. Lundy, S. Mori, S. Garneau-Tsodikova, *RSC Chem. Biol.* 2020, **1**, 233.
- [2] M. A. Marahiel, T. Stachelhaus, H. D. Mootz, *Chem. Rev.* 1997, **97**, 2651.
- [3] A. M. Gulick, *ACS Chem. Biol.* 2009, **4**, 811.
- [4] I. Letunic, P. Bork, *Nucleic Acids Res.* 2021, **49**, W293.
- [5] J. B. Patteson, C. M. Fortinez, A. T. Putz, J. Rodriguez-Rivas, L. H. Bryant, III, K. Adhikari, M. Weigt, T. M. Schmeing, B. Li, *J. Am. Chem. Soc.* 2022, **144**, 14057.
- [6] B. R. Terlouw, K. Blin, J. C. Navarro-Muñoz, N. E. Avalon, M. G. Chevrette, S. Egbert et al., *Nucleic Acids Res.* 2023 **51**, D603.
- [7] A. M. Waterhouse, J. B. Procter, D. M. A. Martin, M. Clamp, G. J. Barton, *Bioinformatics* 2009, **25**, 1189.
- [8] R. He, J. Zhang, Y. Shao, S. Gu, C. Song, L. Qian, W.-B. Yin, Z. Li, *PLoS Comput. Biol.* 2023, **19**, e1011100.
- [9] C. Rausch, I. Hoof, T. Weber, W. Wohlleben, D. H. Huson, *BMC Evol. Biol.* 2007, **7**, 78.
- [10] G. E. Crooks, G. Hon, J.-M. Chandonia, S. E. Brenner, *Genome Res.* 2004, **14**, 1188.
- [11] E. C. Meng, T. D. Goddard, E. F. Pettersen, G. S. Couch, Z. J. Pearson, J. H. Morris, T. E. Ferrin, *Protein Sci.* 2023, **32**, e4792
- [12] K. Blin, S. Shaw, H. E. Augustijn, Z. L. Reitz, F. Biermann, M. Alanjary, A. Fetter, B. R. Terlouw, W. W. Metcalf, E. J. N. Helfrich, G. P. van Wezel, M. H. Medema, T. Weber, *Nucleic Acids Res.* 2023 **51**, W46.
